# Supplementary material for: Relaxin Affects Airway Remodeling Genes Expression through Various Signal Pathways Connected with Transcription Factors
Source: MDPI journal article supplement (doi:10.3390/ijms23158413), 2022-07-29
Supplement: s1 [file s1]

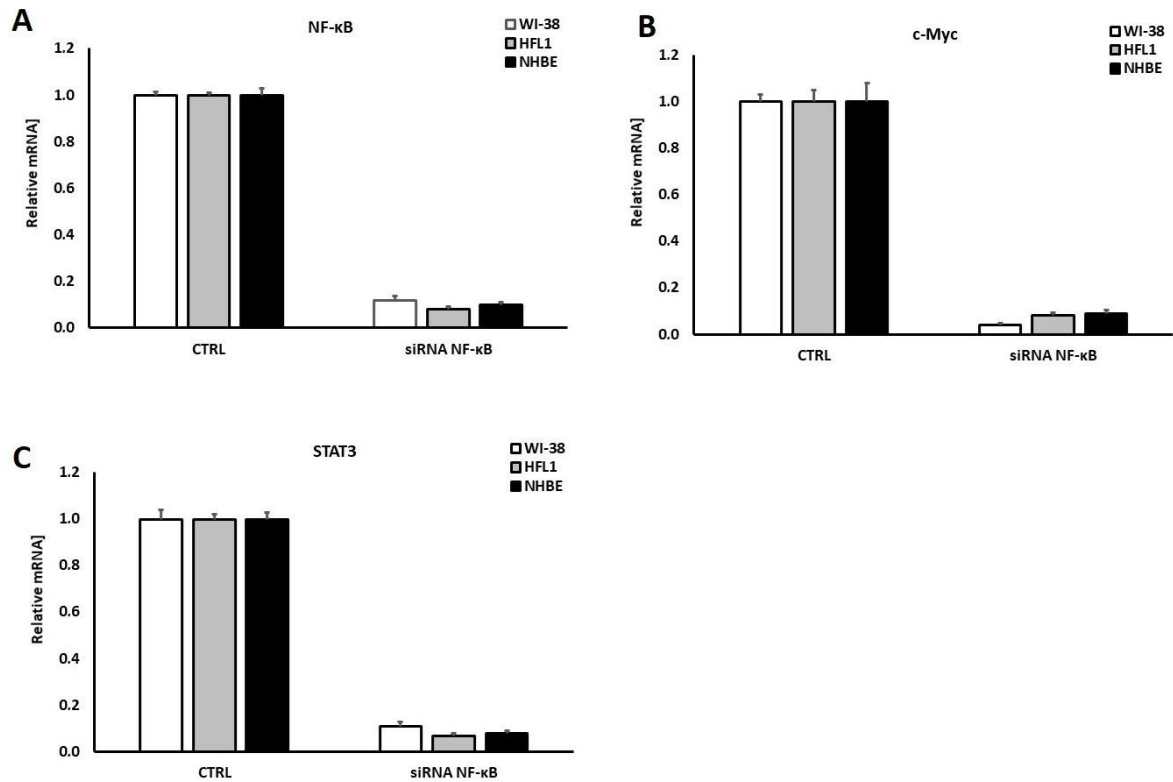

### Figure S1. Knockdown efficiency of siRNA experiments

The transfections were performed when the cells were ~70% confluent. Relative mRNA expression, measured by RT-qPCR was determined, universal negative siRNA was utilized. siRNA transfection of NF- $\kappa$ B (A), c-Myc (B), STAT3 (C) in fibroblasts (WI-38 and HFL1) and epithelial cells (NHBE). Data represent mean of means +SEM (n=3).

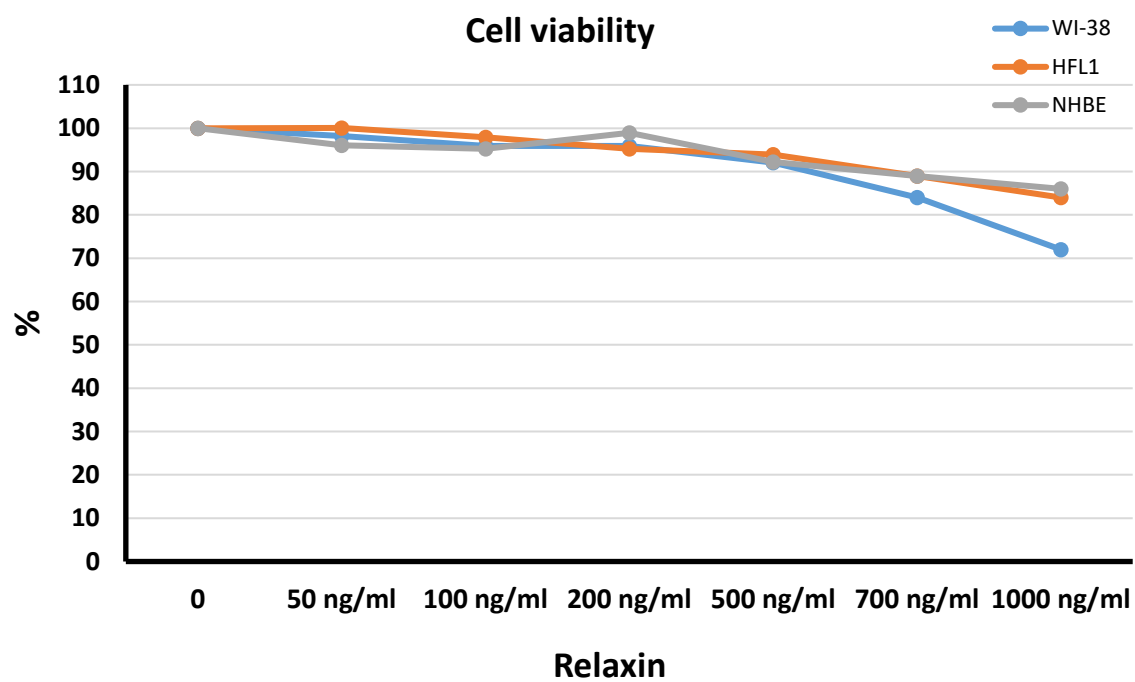

**Figure S2. Cell viability after Relaxin-2 incubation.**
